# Supplementary material for: The role of transesterifications in reversible polycondensations and a reinvestigation of the Jacobson–Beckmann–Stockmayer experiments
Source: Royal Society of Chemistry journal article supplement (doi:10.1039/d1py01679b), 2022-01-01
Supplement: d1py01679b1.pdf [file d1py01679b1.pdf]

## Supplemental Information

### About the Role of Transesterifications in Reversible Polycondensations and a Re-investigation of the Jacobson-Beckmann-Stockmayer Experiments

Hans R. Kricheldorf<sup>a)</sup>, Steffen M. Weidner<sup>b)</sup> and Jana Falkenhagen<sup>b)</sup>

- a) Universität Hamburg, Institut für Technische und Makromolekulare Chemie,  
Bundesstr. 45, D-20145 Hamburg
- b) Bundesanstalt für Materialforschung und -prüfung, BAM 6.3, Richard Willstätter Str.  
11, D-12489 Berlin

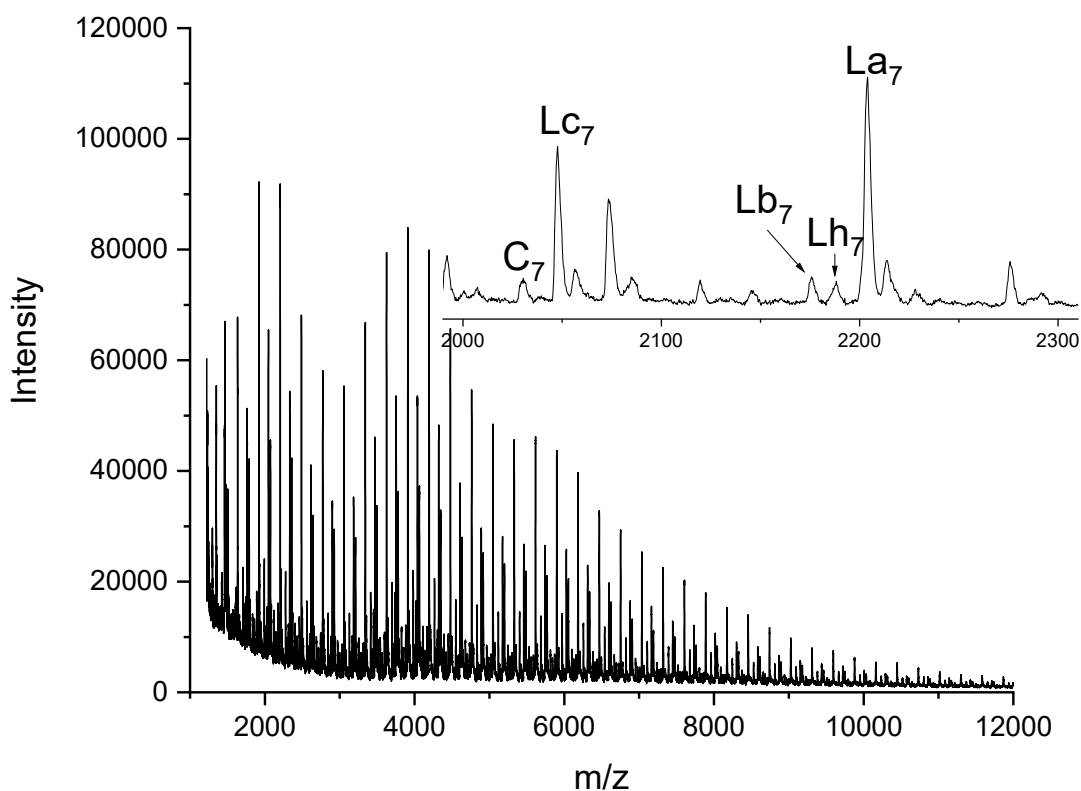

**Figure S1** MALDI TOF mass spectrum of a telechelic PDA prepared with the double amount of TSA-H<sub>2</sub>O (JBS-3, Table 1)

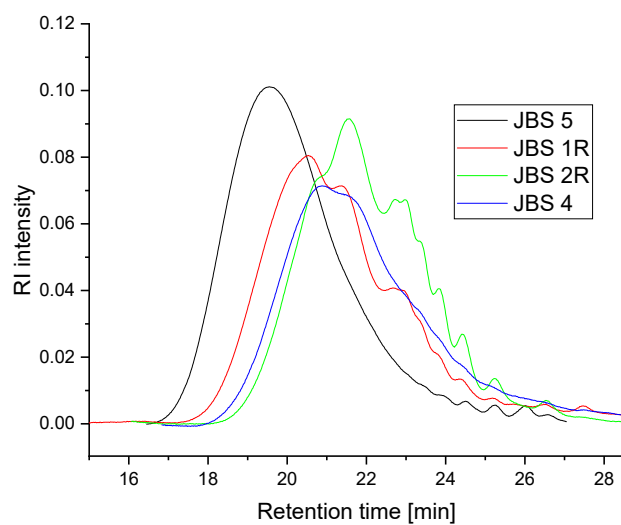

**Figure S2** GPC elution curves of telechelic PDA samples listed in Table 1

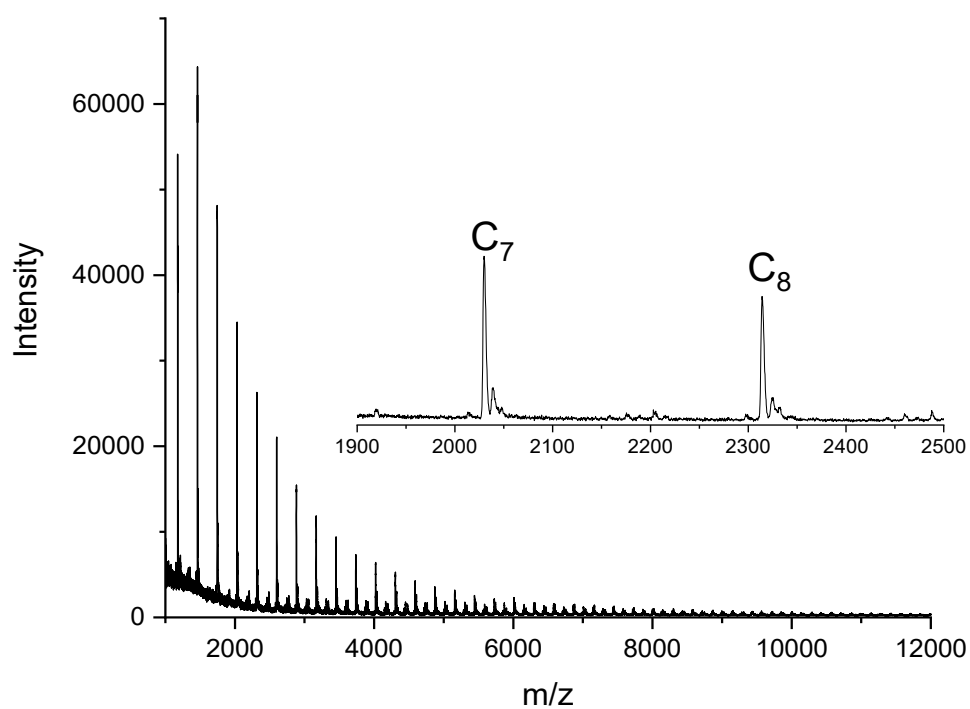

**Figure S3** MALDI TOF mass spectrum of a PDA prepared from equimolar amounts of 1,10-decane diol and adipoyl chloride (cPDA, Table 1).

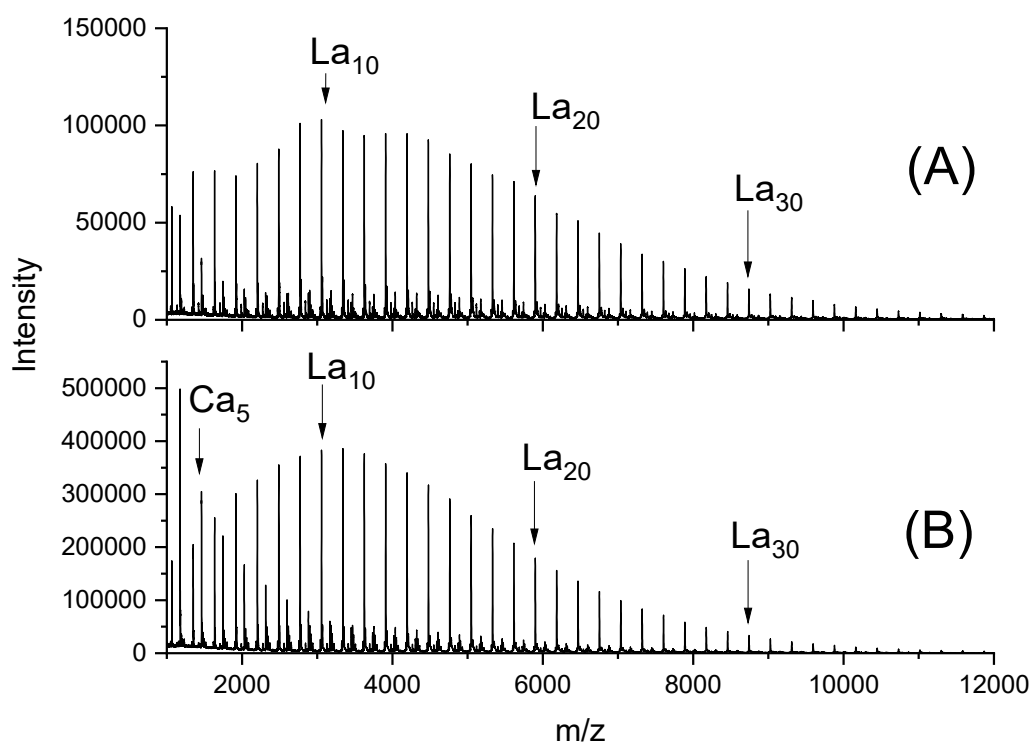

**Figure S4** MALDI TOF mass spectra of telechelic PDA5 equilibrated in chlorobenzene at 130°C (Table 3): (A) 1M solution after 2.5 h, (B) 0.2 M solution after 50h.

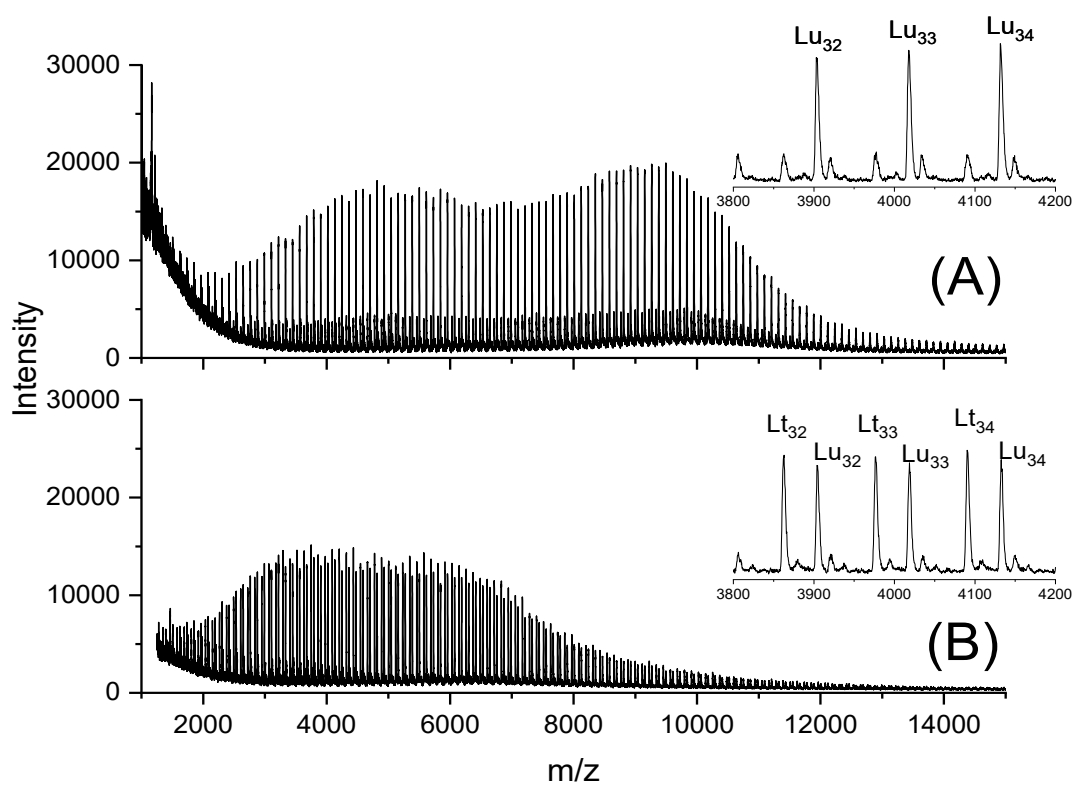

**Figure S5:** MALDI TOF of mass spectra of end-capped PCL used as starting materials for transesterification experiments with DESu

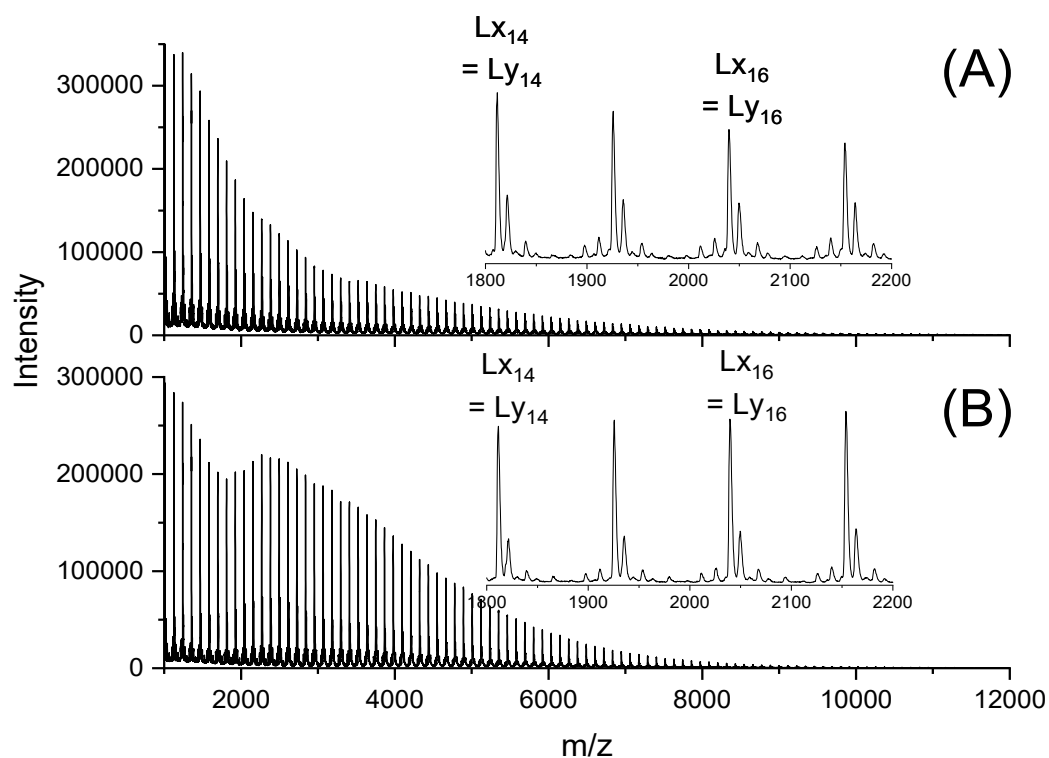

**Figure S6:** MALDI TOF mass spectra of the transesterification products obtained from the mixture of AcPDLUn-2 with DESu at 109°C (Table 5): (A) after 1h, (B) after 2h.

**Table S1** Equilibration of CPDA (DA/Cat = 50/1)

| Exp. No. | Conc. | Temp. (°C) | Time (h) | M <sub>n</sub> | M <sub>w</sub> |
|----------|-------|------------|----------|----------------|----------------|
| 0        | 4.0   | -          | -        | 31 000         | 74 000         |
| 1A       | 1.0   | 130        | 2.5      | 20 500         | 37 000         |
| 1B       | 1.0   | 130        | 25       | 17 800         | 33 200         |
| 2A       | 1.0   | 109        | 2.5      | 22 500         | 40 000         |
| 2B       | 1.0   | 109        | 25       | 20 000         | 38 000         |
| 2B       | 1.0   | 109        | 50       | 16 500         | 35 500         |
